# Supplementary material for: ncDRMarker: a computational method for identifying non-coding RNA signatures of drug resistance based on heterogeneous network
Source: PubMed Central journal article supplement — Ann Transl Med. 2020 Nov;8(21):1395. doi: 10.21037/atm-20-603 (PMC7723624; doi:10.21037/atm-20-603), 2020-11
Supplement: atm-08-21-1395-supplementary.pdf [file atm-08-21-1395-supplementary.pdf]

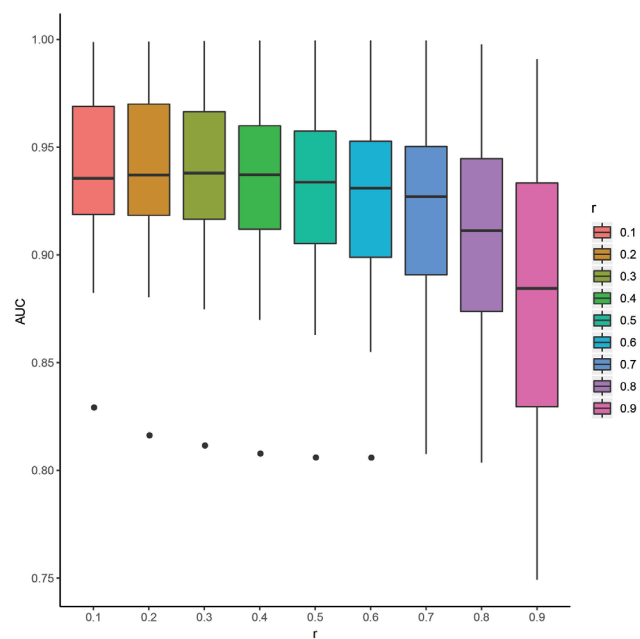

Figure S1 Boxplot of AUC with different restart probability r. AUC, area under curve.

**Table S1** The AUC values for 56 drugs

| Drug name        | AUC      |
|------------------|----------|
| 5-fluorouracil   | 0.895401 |
| Arsenic trioxide | 0.954807 |
| Bortezomib       | 0.910698 |
| Camptothecin     | 0.998841 |
| Carboplatin      | 0.925854 |
| Carmustine       | 0.992604 |
| Celastrol        | 0.975066 |
| Cisplatin        | 0.899972 |
| Crizotinib       | 0.880352 |
| Cyclopamine      | 0.979817 |
| Cyclophosphamide | 0.917642 |
| Cytarabine       | 0.972832 |
| Dasatinib        | 0.907179 |
| Daunorubicin     | 0.960053 |
| Decitabine       | 0.993539 |
| Dexamethasone    | 0.969055 |
| Docetaxel        | 0.940776 |
| Doxorubicin      | 0.897135 |
| Epirubicin       | 0.96032  |
| Erlotinib        | 0.950577 |
| Etoposide        | 0.948093 |
| Fludarabine      | 0.994175 |
| Fulvestrant      | 0.99276  |
| Gefitinib        | 0.929079 |
| Gemcitabine      | 0.883788 |
| Herceptin        | 0.943137 |
| Hydroxyurea      | 0.920964 |
| Imatinib         | 0.939539 |
| Irinotecan       | 0.816221 |
| Lapatinib        | 0.935094 |
| Letrozole        | 0.933701 |
| Melphalan        | 0.998998 |
| Methotrexate     | 0.927484 |
| Mitomycin C      | 0.931888 |
| Mitoxantrone     | 0.956754 |
| Olaparib         | 0.962921 |
| Oxaliplatin      | 0.902214 |
| Paclitaxel       | 0.906851 |
| PD-0325901       | 0.989943 |
| Pemetrexed       | 0.984658 |
| PLX4720          | 0.920567 |
| Prednisolone     | 0.957559 |
| Ribavirin        | 0.973524 |
| Sunitinib        | 0.987083 |
| Sorafenib        | 0.880669 |
| Sunitinib        | 0.93242  |
| Tamoxifen        | 0.928211 |
| Temozolomide     | 0.938996 |
| Teniposide       | 0.994462 |
| Topotecan        | 0.925976 |
| Vemurafenib      | 0.9186   |
| Verapamil        | 0.911376 |
| Vinblastine      | 0.94019  |
| Vincristine      | 0.932329 |
| Vinorelbine      | 0.896929 |
| Vorinostat       | 0.926175 |

AUC, area under curve.

**Table S2** Candidate ncRNA signatures of drug resistance

| Drug name      | Candidate ncRNAs (top 50)                                                                                                                                                                                                                                                                                                                                                                                                                                                                                                                                                                                                                                                                                                                                         |
|----------------|-------------------------------------------------------------------------------------------------------------------------------------------------------------------------------------------------------------------------------------------------------------------------------------------------------------------------------------------------------------------------------------------------------------------------------------------------------------------------------------------------------------------------------------------------------------------------------------------------------------------------------------------------------------------------------------------------------------------------------------------------------------------|
| 5-fluorouracil | miR-335-5p, miR-16-5p, miR-124-3p, NEAT1, let-7a-5p, MALAT1, miR-519d-3p, miR-186-5p, miR-30c-5p, miR-19a-3p, miR-9-5p, let-7f-5p, miR-8485, miR-485-5p, miR-6499-3p, miR-149-3p, miR-455-3p, miR-4728-5p, miR-877-3p, miR-6883-5p, miR-6785-5p, miR-1827, miR-7106-5p, miR-30b-3p, LINC00657, miR-526b-3p, miR-362-3p, miR-6849-3p, miR-6778-3p, miR-1277-5p, miR-30c-1-3p, miR-30c-2-3p, miR-150-5p, miR-375, miR-181b-5p, miR-7977, miR-4459, miR-6808-5p, miR-6893-5p, OIP5-AS1, KCNQ1OT1, miR-302c-3p, miR-5011-5p, miR-6799-5p, miR-190a-3p, miR-6516-5p, miR-10a-5p, miR-1304-3p, miR-574-5p, miR-4768-3p                                                                                                                                                  |
| Cisplatin      | miR-124-3p, NEAT1, miR-1-3p, LINC00657, miR-8485, miR-6499-3p, miR-877-3p, miR-455-3p, miR-149-3p, miR-1277-5p, miR-1827, miR-4728-5p, miR-362-3p, miR-6883-5p, miR-6785-5p, miR-30b-3p, miR-301a-3p, miR-7106-5p, miR-5011-5p, miR-665, miR-190a-3p, OIP5-AS1, miR-574-5p, miR-539-5p, miR-30c-1-3p, miR-30c-2-3p, miR-6849-3p, miR-454-3p, KCNQ1OT1, miR-6778-3p, CTB-89H12, miR-7977, miR-423-5p, miR-4459, miR-185-3p, miR-1304-3p, miR-6808-5p, miR-520b, miR-6893-5p, miR-520e, miR-186-3p, miR-590-3p, miR-302e, miR-6516-5p, miR-6799-5p, miR-3613-3p, miR-142-3p, miR-130b-5p, miR-137, miR-6779-5p                                                                                                                                                      |
| Gemcitabine    | miR-335-5p, miR-26b-5p, miR-124-3p, miR-92a-3p, miR-93-5p, NEAT1, miR-106b-5p, miR-24-3p, miR-1-3p, MALAT1, miR-186-5p, XIST, miR-320a, miR-103a-3p, miR-30c-5p, miR-26a-5p, miR-8485, miR-6499-3p, miR-485-5p, miR-149-3p, miR-4728-5p, miR-6883-5p, miR-6785-5p, miR-877-3p, miR-1827, miR-107, let-7g-5p, miR-30b-5p, miR-7106-5p, miR-30b-3p, miR-215-5p, LINC00657, miR-6849-3p, miR-362-3p, miR-23b-3p, miR-6778-3p, miR-1277-5p, miR-4459, miR-526b-3p, miR-122-5p, OIP5-AS1, miR-7977, miR-150-5p, miR-375, miR-6808-5p, miR-6516-5p, miR-6893-5p, miR-6799-5p, miR-5011-5p, miR-4768-3p                                                                                                                                                                  |
| Imatinib       | miR-26b-5p, miR-93-5p, miR-92a-3p, NEAT1, miR-204-5p, miR-27a-3p, miR-497-5p, miR-106b-5p, miR-34a-5p, miR-20a-5p, miR-24-3p, miR-218-5p, miR-20b-5p, miR-19b-3p, miR-484, MALAT1, miR-192-5p, let-7g-5p, XIST, miR-19a-3p, miR-7-5p, miR-320a, miR-186-5p, miR-615-3p, miR-519d-3p, miR-106a-5p, miR-98-5p, miR-125b-5p, miR-92b-3p, miR-23b-3p, miR-29a-3p, miR-129-5p, miR-766-3p, miR-185-5p, miR-149-5p, miR-30d-5p, miR-485-5p, miR-23a-3p, KCNQ1OT1, miR-32-5p, miR-8485, LINC00657, miR-877-3p, miR-940, miR-215-5p, miR-145-5p, miR-375, miR-454-3p, miR-455-3p                                                                                                                                                                                          |
| Docetaxel      | miR-335-5p, miR-124-3p, let-7b-5p, miR-92a-3p, miR-93-5p, miR-15b-5p, NEAT1, miR-106b-5p, miR-218-5p, miR-1-3p, miR-497-5p, miR-484, MALAT1, miR-192-5p, miR-19b-3p, let-7a-5p, miR-30c-5p, miR-320a, XIST, miR-103a-3p, miR-186-5p, miR-132-3p, miR-519d-3p, miR-615-3p, miR-19a-3p, let-7e-5p, miR-30b-5p, miR-106a-5p, miR-148b-3p, miR-130b-3p, miR-98-5p, miR-107, miR-92b-3p, let-7f-5p, miR-18a-5p, miR-23b-3p, miR-29b-3p, miR-32-5p, miR-8485, miR-766-3p, miR-485-5p, miR-215-5p, let-7g-5p, miR-185-5p, LINC00657, let-7i-5p, miR-877-3p, miR-455-3p, miR-23a-3p, miR-181c-5p                                                                                                                                                                          |
| Doxorubicin    | MALAT1, miR-24-3p, XIST, miR-519d-3p, miR-8485, LINC00657, miR-148b-3p, miR-940, miR-877-3p, miR-455-3p, miR-6499-3p, miR-1277-5p, miR-362-3p, miR-1827, miR-149-3p, miR-526b-3p, miR-5008-3p, miR-4728-5p, miR-5011-5p, miR-30b-3p, miR-190a-3p, miR-6883-5p, miR-6785-5p, miR-665, miR-7106-5p, miR-574-5p, miR-30c-1-3p, miR-6849-3p, miR-30c-2-3p, KCNQ1OT1, OIP5-AS1, miR-6778-3p, miR-1304-3p, miR-4459, miR-7977, miR-3613-3p, miR-6808-5p, miR-590-3p, miR-6893-5p, miR-302d-3p, miR-142-3p, miR-6516-5p, miR-186-3p, miR-6799-5p, miR-423-5p, miR-3653-5p, miR-4768-3p, miR-603, miR-520b, miR-520e                                                                                                                                                      |
| Erlotinib      | miR-335-5p, miR-16-5p, miR-26b-5p, miR-93-5p, let-7b-5p, miR-124-3p, miR-15a-5p, miR-15b-5p, NEAT1, miR-92a-3p, miR-195-5p, miR-20a-5p, miR-106b-5p, miR-218-5p, miR-20b-5p, miR-24-3p, miR-30c-5p, miR-424-5p, miR-27b-3p, miR-27a-3p, miR-1-3p, let-7a-5p, XIST, miR-181a-5p, miR-19b-3p, MALAT1, miR-30a-5p, miR-484, miR-192-5p, miR-103a-3p, miR-7-5p, miR-193b-3p, miR-320a, miR-519d-3p, miR-26a-5p, let-7e-5p, miR-186-5p, miR-106a-5p, LINC00657, miR-19a-3p, CTB-89H12, miR-107, miR-9-5p, miR-98-5p, miR-130b-3p, let-7f-5p, miR-615-3p, miR-148b-3p, miR-101-3p, miR-129-5p                                                                                                                                                                           |
| Tamoxifen      | hsa-miR-335-5p, hsa-miR-26b-5p, hsa-miR-93-5p, hsa-miR-124-3p, hsa-miR-92a-3p, hsa-miR-15b-5p, hsa-miR-106b-5p, NEAT1, hsa-miR-195-5p, hsa-miR-484, hsa-miR-218-5p, hsa-miR-204-5p, hsa-miR-27a-3p, hsa-miR-1-3p, hsa-let-7a-5p, hsa-miR-497-5p, MALAT1, XIST, hsa-miR-186-5p, hsa-miR-424-5p, hsa-miR-320a, hsa-let-7e-5p, hsa-miR-26a-5p, LINC00657, hsa-miR-30a-5p, hsa-miR-9-5p, hsa-miR-30c-5p, hsa-miR-98-5p, hsa-let-7f-5p, hsa-miR-92b-3p, hsa-miR-215-5p, hsa-miR-129-5p, hsa-miR-766-3p, hsa-miR-130b-3p, hsa-miR-8485, hsa-let-7g-5p, hsa-miR-485-5p, hsa-miR-30b-5p, hsa-miR-23a-3p, hsa-miR-877-3p, hsa-miR-101-3p, hsa-miR-940, hsa-miR-25-3p, hsa-miR-455-3p, hsa-miR-526b-3p, hsa-let-7d-5p, hsa-miR-6499-3p, KCNQ1OT1, hsa-miR-29a-3p, CTB-89H12 |
| Paclitaxel     | miR-26b-5p, miR-185-5p, miR-92a-3p, miR-93-5p, MALAT1, miR-103a-3p, miR-519d-3p, let-7f-5p, miR-92b-3p, miR-98-5p, miR-766-3p, LINC00657, miR-148b-3p, miR-8485, miR-485-5p, miR-23a-3p, miR-940, miR-455-3p, miR-877-3p, miR-6499-3p, miR-149-3p, miR-1827, miR-4728-5p, miR-526b-3p, miR-362-3p, miR-1277-5p, miR-30b-3p, miR-6785-5p, miR-6883-5p, miR-665, miR-7106-5p, miR-122-5p, miR-30c-1-3p, miR-30c-2-3p, OIP5-AS1, miR-6849-3p, miR-5011-5p, miR-190a-3p, miR-520a-3p, miR-574-5p, miR-454-3p, let-7c-5p, miR-30d-5p, miR-302c-3p, miR-30e-5p, miR-302a-3p, miR-6778-3p, miR-7977, miR-4459, miR-520c-3p                                                                                                                                               |
| Sorafenib      | miR-335-5p, miR-16-5p, miR-26b-5p, miR-124-3p, let-7b-5p, miR-93-5p, miR-17-5p, miR-92a-3p, NEAT1, miR-1-3p, miR-15b-5p, miR-15a-5p, miR-27a-3p, miR-20b-5p, miR-218-5p, miR-24-3p, miR-484, miR-195-5p, miR-19b-3p, XIST, MALAT1, miR-155-5p, miR-497-5p, let-7a-5p, miR-186-5p, miR-519d-3p, miR-615-3p, miR-215-5p, miR-30c-5p, miR-19a-3p, miR-106a-5p, miR-26a-5p, miR-320a, let-7e-5p, miR-9-5p, miR-103a-3p, miR-424-5p, miR-30b-5p, miR-98-5p, miR-129-5p, miR-8485, miR-766-3p, miR-125b-5p, miR-92b-3p, miR-877-3p, miR-21-5p, OIP5-AS1, let-7f-5p, miR-101-3p, miR-455-3p                                                                                                                                                                              |

**Table S3** candidate ncRNAs involved in multiple drugs resistance and enriched pathways

| miRNA       | Drug name                                                                                                  | Pathway ID                                                                                                                                                                                             |
|-------------|------------------------------------------------------------------------------------------------------------|--------------------------------------------------------------------------------------------------------------------------------------------------------------------------------------------------------|
| miR-92a-3p  | Paclitaxel, sorafenib, gemcitabine, imatinib, Docetaxel, tamoxifen, erlotinib                              | hsa04110, hsa03010, hsa03013, hsa05200, hsa04919, hsa05169, hsa03018, hsa05130, hsa05205, hsa04068, hsa05161, hsa03040, hsa04115, hsa05166, hsa03050, hsa04144, hsa04152, hsa04390, hsa01230, hsa04114 |
| miR-124-3p  | Cisplatin, gemcitabine, erlotinib, docetaxel, sorafenib, tamoxifen, 5-fluorouracil                         | hsa05200, hsa05100, hsa05205, hsa04933, hsa05166, hsa04072, hsa04611, hsa04360, hsa04370, hsa04071, hsa05132, hsa04550, hsa04530, hsa05161, hsa05130, hsa05202, M00087, hsa04730, hsa04520, hsa04912   |
| miR-335-5p  | Gemcitabine, docetaxel, erlotinib, tamoxifen, sorafenib, 5-fluorouracil                                    | hsa00100, hsa04060, hsa04151, hsa04014, hsa05224, hsa04915, hsa04010, hsa04970, hsa04020, hsa04610, hsa04550, hsa05202, hsa04933, hsa04670, hsa04072, hsa04640, hsa04657, hsa04931, M00098, hsa04972   |
| miR-8485    | Cisplatin, paclitaxel, gemcitabine, imatinib, docetaxel, tamoxifen, sorafenib, doxorubicin, 5-fluorouracil | hsa05200, hsa05203, hsa05217, hsa04360, hsa05215, hsa04931, hsa05211, hsa04144, hsa04392, hsa04630, hsa05202, hsa04340                                                                                 |
| miR-877-3p  | Cisplatin, paclitaxel, gemcitabine, imatinib, docetaxel, tamoxifen, sorafenib, doxorubicin, 5-fluorouracil | hsa03040, hsa05130, hsa03013, hsa04213, hsa04915, hsa05169, hsa05110, hsa04810, hsa04070, hsa04722, hsa05223, M00001, hsa05164, hsa04721, hsa00650, hsa04144, hsa03015                                 |
| miR-455-3p  | Cisplatin, paclitaxel, imatinib, docetaxel, tamoxifen, sorafenib, doxorubicin, 5-fluorouracil              | hsa04142, hsa04141, hsa05202, hsa00270, hsa04130, hsa05200, hsa01040, hsa04115, hsa04110                                                                                                               |
| miR-6499-3p | Cisplatin, paclitaxel, gemcitabine, tamoxifen, doxorubicin, 5-fluorouracil                                 | M00034, hsa04141, hsa00512, hsa04142, hsa00130, hsa04062, hsa04064, hsa05230, hsa04915, hsa05162                                                                                                       |
| miR-30c-5p  | Gemcitabine, docetaxel, erlotinib, tamoxifen, sorafenib, 5-fluorouracil                                    | hsa05211, hsa05212, hsa05200, hsa05169, hsa05206, hsa04120, hsa04380, hsa05168, hsa04310, hsa04141, hsa04932, hsa05166, hsa04371, hsa04115, hsa04390, hsa04320, hsa04520, hsa03040                     |
| miR-93-5p   | Paclitaxel, erlotinib, gemcitabine, imatinib, docetaxel, tamoxifen, sorafenib                              | hsa05200, hsa05166, hsa04144, hsa05212, hsa04390, hsa05205, hsa04140, hsa05164, hsa04137, hsa04919, hsa04115, hsa04962, hsa04010, hsa04810, hsa04120, hsa04210, hsa04910, hsa04152, hsa03013, hsa04668 |
| miR-519d-3p | Paclitaxel, imatinib, docetaxel, erlotinib, sorafenib, doxorubicin, 5-fluorouracil                         | hsa05200, hsa04144, hsa04350, hsa04140, hsa04115, hsa05205, hsa05164, hsa04810, hsa04962, hsa05211, hsa01524, hsa03018, hsa04360, hsa04137, hsa05203, hsa04151, hsa00240, hsa04611, hsa04931, hsa04010 |
| miR-98-5p   | Paclitaxel, imatinib, docetaxel, sorafenib, tamoxifen, erlotinib                                           | hsa05203, hsa05200, hsa04066, hsa04068, hsa05206, hsa04630, hsa05205, hsa04211, hsa04550, hsa05202, hsa05169, hsa04668, hsa04115, hsa05120, hsa04350, hsa04666, hsa00230, hsa05162, hsa04010, hsa04977 |
| miR-186-5p  | Gemcitabine, imatinib, docetaxel, tamoxifen, erlotinib, sorafenib, 5-fluorouracil                          | hsa03010, hsa03013, hsa03040, hsa04550, hsa03050, hsa00310, hsa04014, hsa05230, hsa00190, M00135, hsa04710, hsa04390, hsa04137, hsa05205, hsa04540, hsa05220, hsa00620, hsa05412, hsa04360, hsa05100   |
| let-7f-5p   | Paclitaxel, docetaxel, tamoxifen, erlotinib, sorafenib, 5-fluorouracil                                     | hsa04115, hsa04630, hsa04110, hsa05169, hsa04068, hsa05214, hsa05224, hsa05130, hsa04657, hsa05120, hsa04380, hsa00240                                                                                 |
| miR-1-3p    | Cisplatin, docetaxel, gemcitabine, tamoxifen, erlotinib, sorafenib                                         | hsa05200, hsa05205, hsa05034, hsa05410, hsa04261, hsa03030, hsa05132, hsa04933, hsa04062, hsa04530, hsa05214, hsa05100, hsa05206, hsa05323, hsa04320, hsa04520, hsa03015, hsa03040, hsa01212, hsa05418 |
| miR-320a    | Gemcitabine, imatinib, docetaxel, tamoxifen, erlotinib, sorafenib                                          | hsa05131, hsa05202, hsa05203, hsa05200, hsa03010, hsa05012, hsa05211, hsa05166, hsa04919, hsa04114, hsa05206, hsa03013, hsa04722, hsa04141, hsa00230, hsa05130, hsa04390, hsa04550, hsa04022, hsa05110 |
| miR-485-5p  | Paclitaxel, tamoxifen, gemcitabine, imatinib, docetaxel, 5-fluorouracil                                    | hsa04210, hsa03030, hsa04064, hsa00240, hsa04962, hsa05168, hsa05215, hsa05164, hsa00250, hsa05202                                                                                                     |
| miR-26b-5p  | Paclitaxel, gemcitabine, imatinib, tamoxifen, erlotinib, sorafenib                                         | hsa04115, hsa05222, hsa05010, hsa05134, hsa05203, hsa01524, hsa04210, hsa04657, hsa05418, hsa04010, hsa04933, hsa04974, hsa05161, hsa05218, hsa04371, hsa04144, hsa04978, hsa04060, hsa04066, hsa04072 |
| LINC00657   | Cisplatin, paclitaxel, gemcitabine, imatinib, docetaxel, tamoxifen, erlotinib, doxorubicin, 5-fluorouracil | M00052, hsa04070, hsa04114                                                                                                                                                                             |
